# Supplementary material
Source: publisher figshare collection journal article supplement (https://tandf.figshare.com/articles/dataset/_/25259494)
Supplement: Supplementary file 1 [file 1]

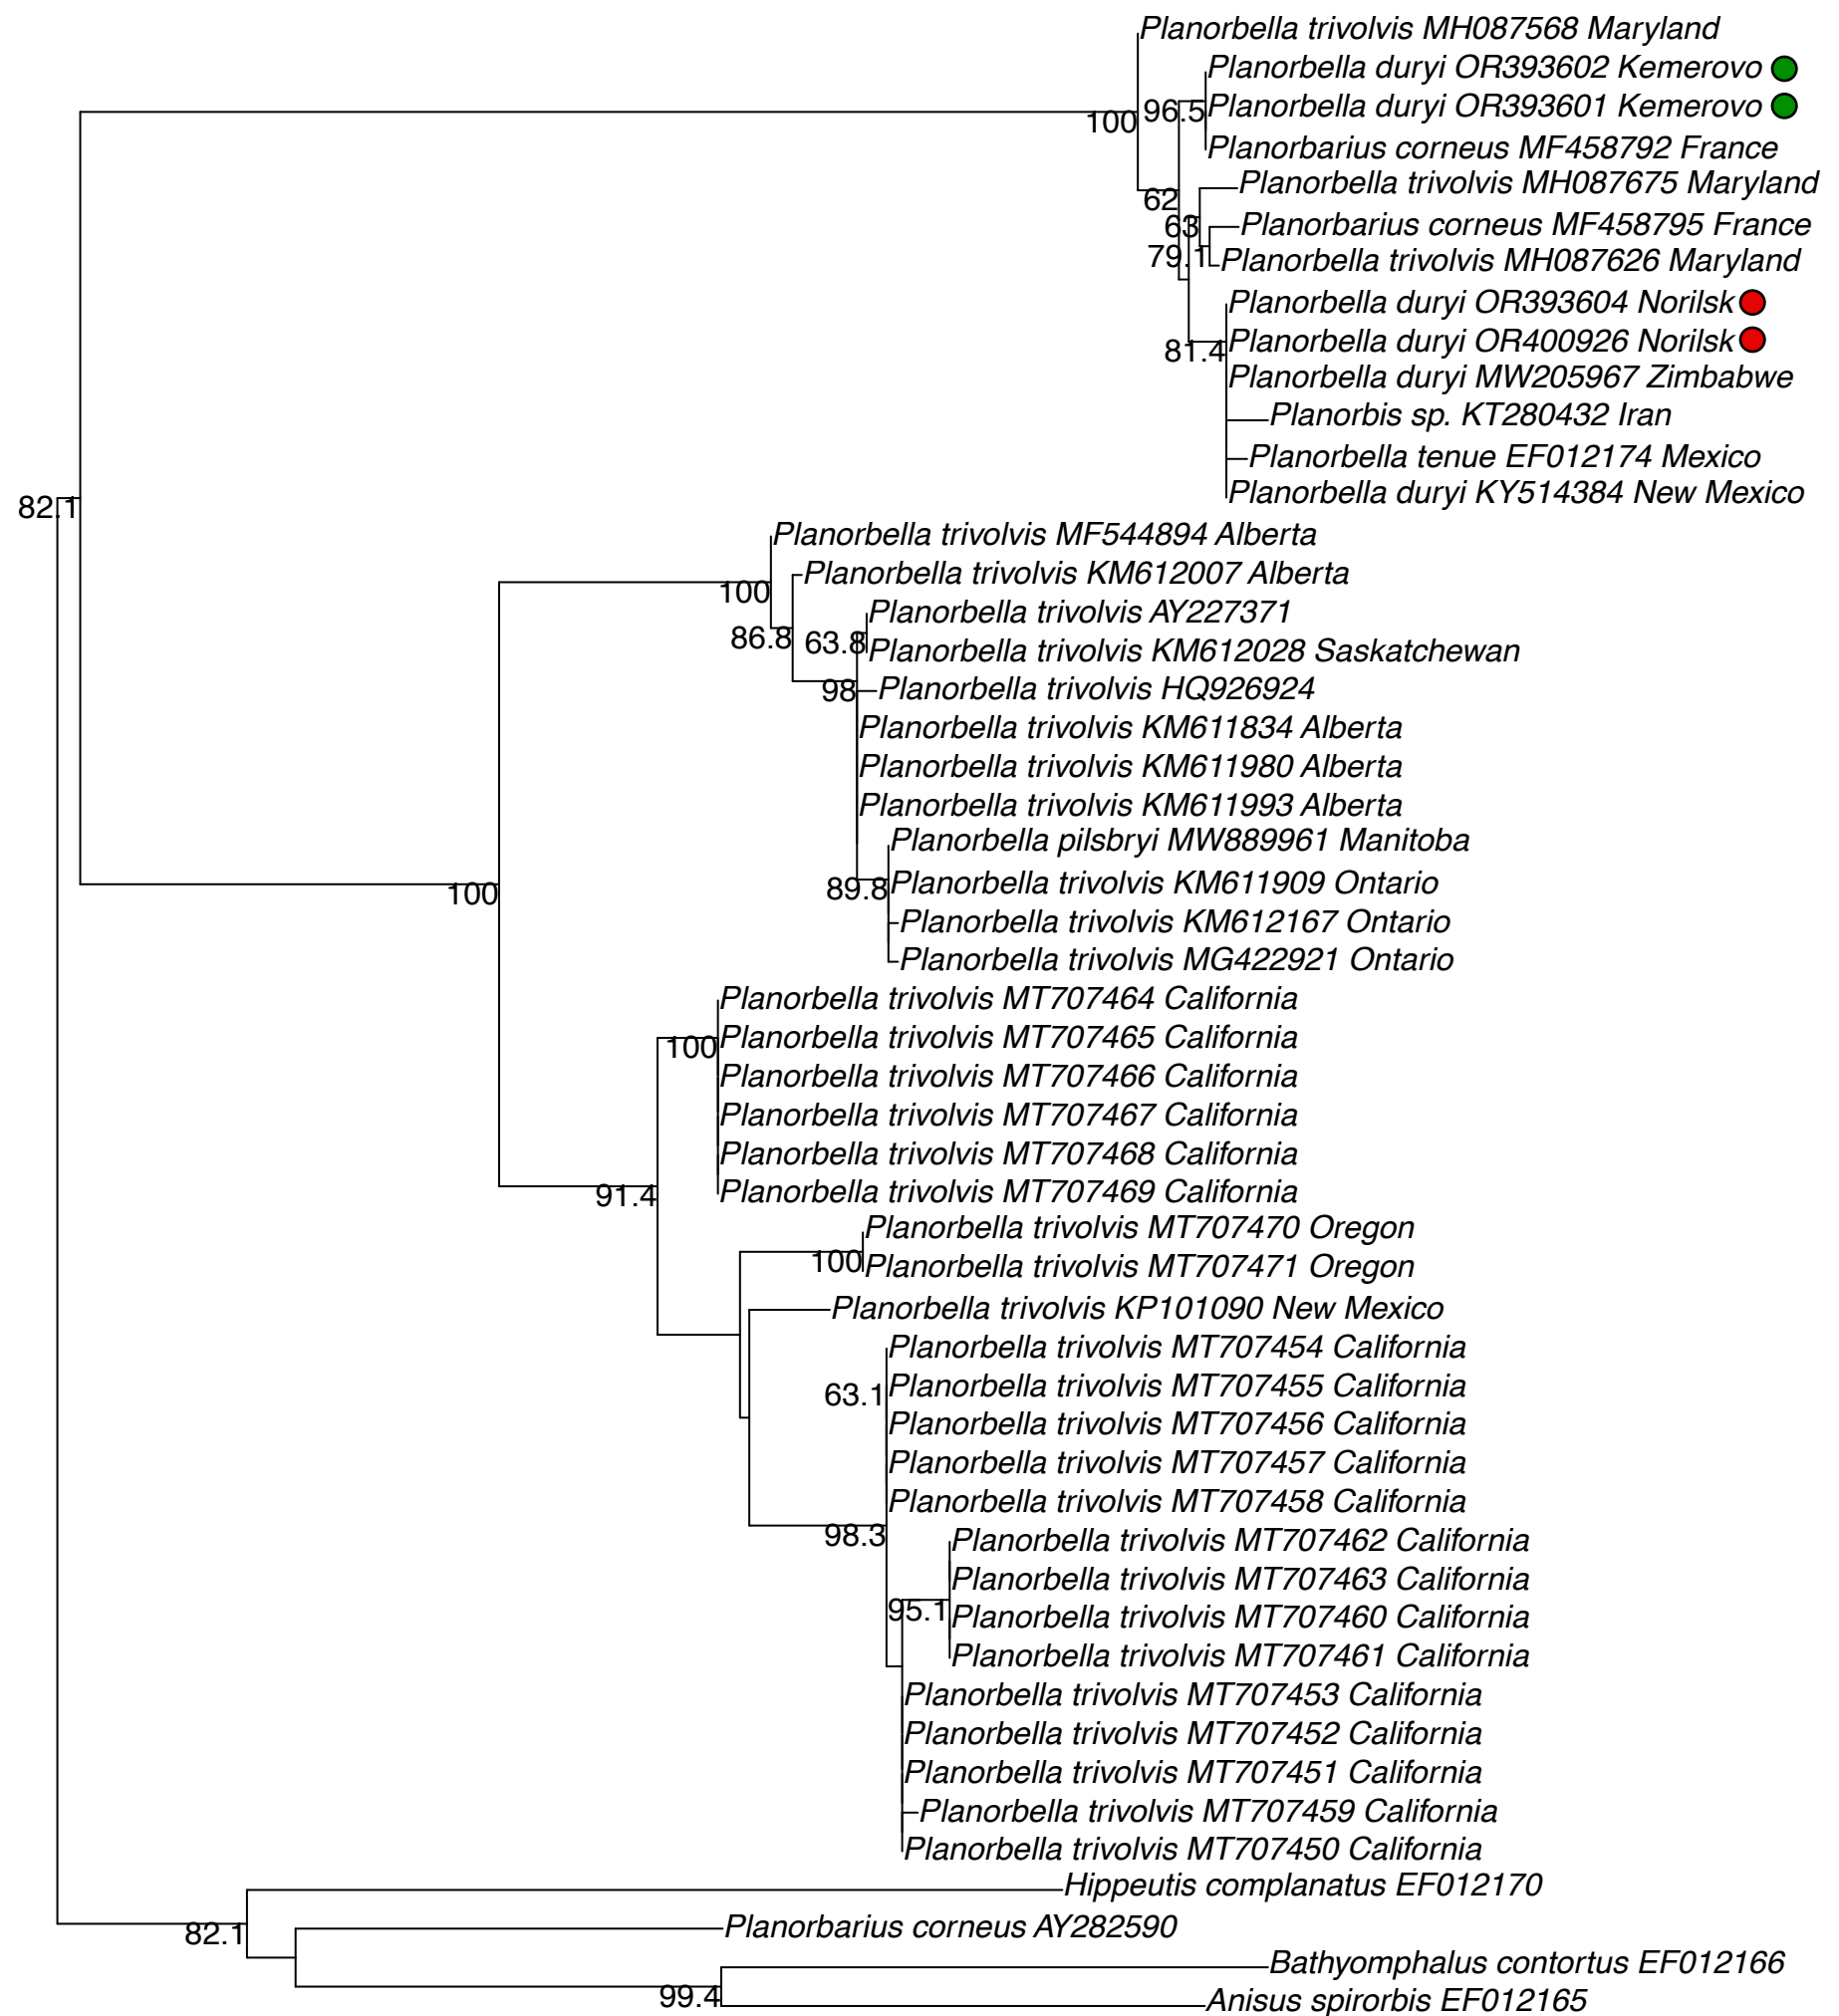

Supplementary material. ML tree of *Planorbella* based on COI gene fragments. Sequences from Norilsk are highlighted by red dots, sequences from Kemerovo – by green dots
